# Supplementary material for: miR-429 regulates the transition between Hypoxia-Inducible Factor (HIF)1A and HIF3A expression in human endothelial cells
Source: PubMed Central journal article supplement (PMC4782134; doi:10.1038/srep22775), 2016-03-08
Supplement: srep22775-s1.pdf [file srep22775-s1.pdf]

## SUPPLEMENTARY INFORMATION

### miR-429 regulates the transition between Hypoxia-Inducible Factor (HIF)1A and HIF3A expression in human endothelial cells

Anna Janaszak-Jasiecka, Sylwia Bartoszewska, Kinga Kochan, Arkadiusz Piotrowski;  
Leszek Kalinowski; Wojciech Kamysz, Renata J. Ochocka, Rafał Bartoszewski, and James  
F. Collawn

Janaszak & Bartoszewska et al, *Supplemental Figure 1*

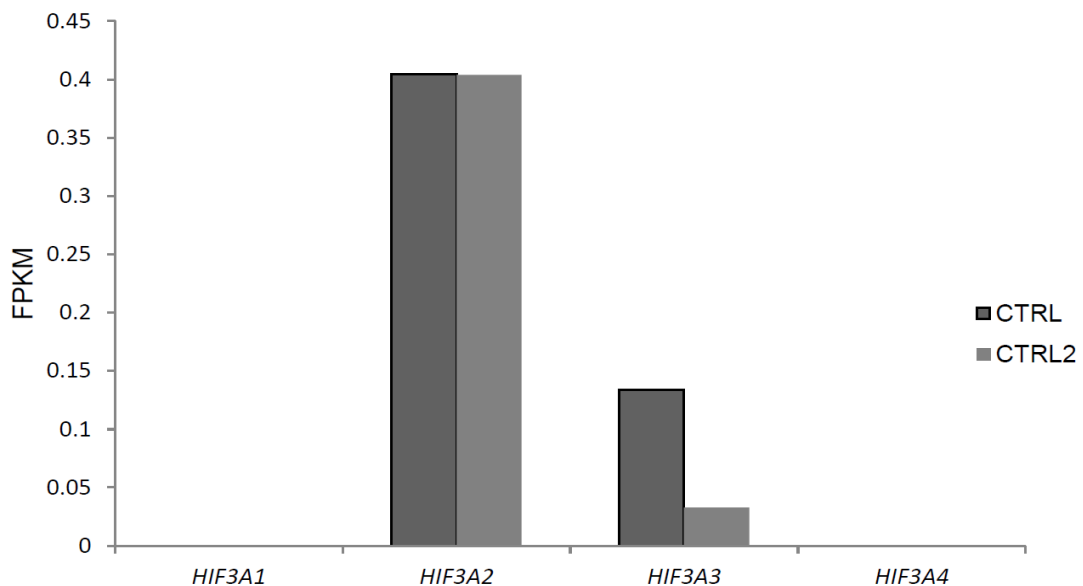

**Supplemental Figure 1.** The Next Generation Sequencing (NGS) analysis of *HIF3A* isoforms relative expression (Fragments Per Kilobase of transcript per Million mapped reads). In HUVECs, expression of only 2 isoforms was observed in all analyzed samples (two HUVEC control samples, CTRL and CTRL2). Neither the *HIF3A1* (NM\_152794.3) nor *HIF3A4* (NM\_152796.2) transcript variants were expressed in the samples.

|              | <i>DDIT4</i>                   | <i>HIF1A</i>                       | <i>miR-429</i>                    |
|--------------|--------------------------------|------------------------------------|-----------------------------------|
| <i>HIF3A</i> | C.C.= 0.426<br>p =0.03<br>n=24 | C.C.= -0.796<br>p =3.3 e-7<br>n=24 | C.C.= -0.546<br>p =0.006<br>n=24  |
| <i>DDIT4</i> |                                | C.C.= -0.272<br>p =0.198<br>n=24   | C.C.= -0.051<br>p =0.811<br>n=24  |
| <i>HIF1A</i> |                                |                                    | C.C.= 0.893<br>p =4.1 e-9<br>n=24 |

**Supplemental Figure 2.** Correlation of expression profiles of miR-429, *HIF1A*, *HIF3A2* and *DDIT4*. The qRT-PCR results of hypoxia-induced changes in mRNA and miRNA levels were subjected to Pearson product-moment correlation tests. The pair(s) of variables (mRNA-mRNA and mRNA-miR-429) with positive correlation coefficients (C.C.) and P values below 0.050 increased together (dark grey). For the pairs with negative correlation coefficients and P values below 0.050, one variable decreased while the other increased (light grey). For pairs with P values greater than 0.050 (white), there was no significant relationship between the two variables (n = number of tested values). Pearson product-moment correlation tests were performed with SigmaPlot software.

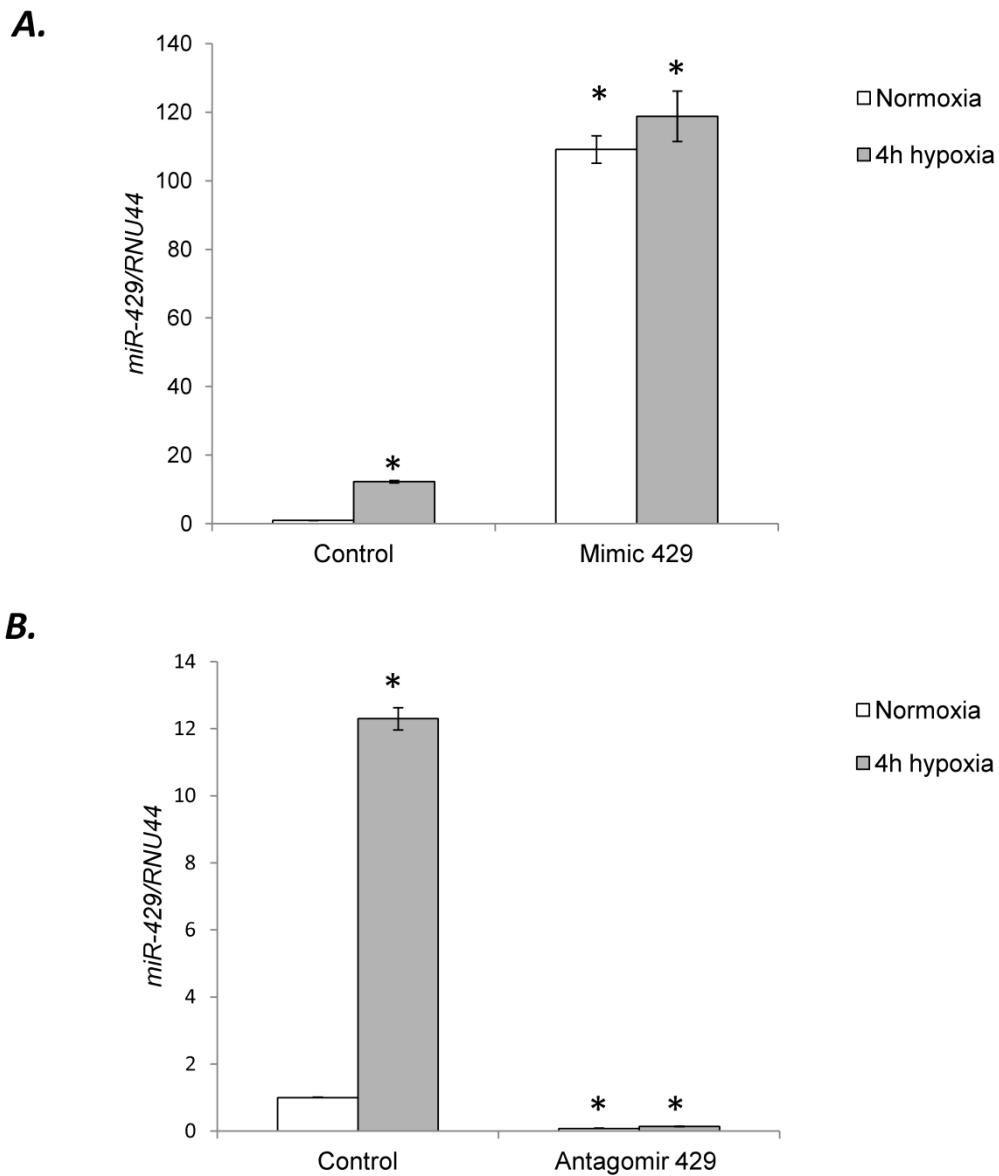

**Supplemental Figure 3.** Transfections of HUVECs with miR-429 mimic (**A**) and AntagomiR (**B**) were efficient both in normoxia and during hypoxia. miRNA levels were monitored in qRT-PCR experiments. The miRNA levels results from 2 independent experiments (n=8) are plotted normalized to RNU44 levels and expressed as a fold change over the control transfection (with c-67). Significant changes ( $p < 0.05$ ) are marked with an "\*".

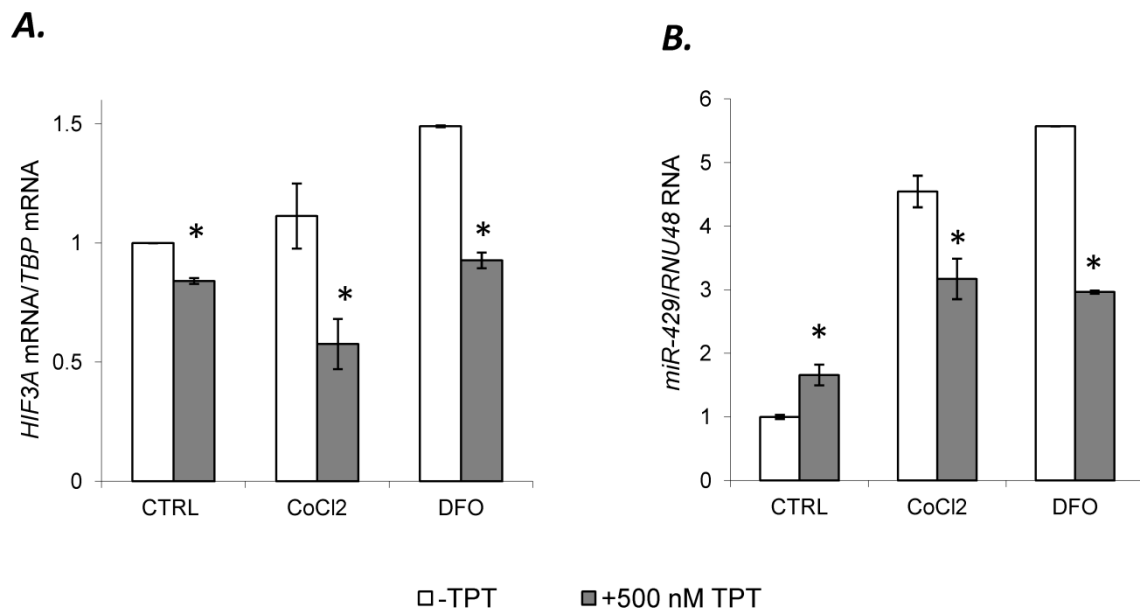

**Supplemental Figure 4.** HIF-1 induces HIF3A (A) and miR-429 (B) expression during treatment with hypoxia mimetics. HUVECs were treated with hypoxia mimetics (100  $\mu$ M desferoxamine (DFO) for 6h or 200  $\mu$ M CoCl<sub>2</sub> for 12h) and with or without (grey and white, respectively) a HIF-1 functional inhibitor (topotecan (500  $\mu$ M TPT). mRNA and miRNA levels were monitored in qRT-PCR experiments. The miRNA levels results from 2 independent experiments (n=8) are plotted normalized to RNU44 levels and expressed as a fold change over the untreated control. The mRNA levels results from 2 independent experiments (n=12) are normalized to TBP mRNA levels and expressed as a fold-change over the untreated control. Significant changes (p<0.05) are marked with an "\*\*"

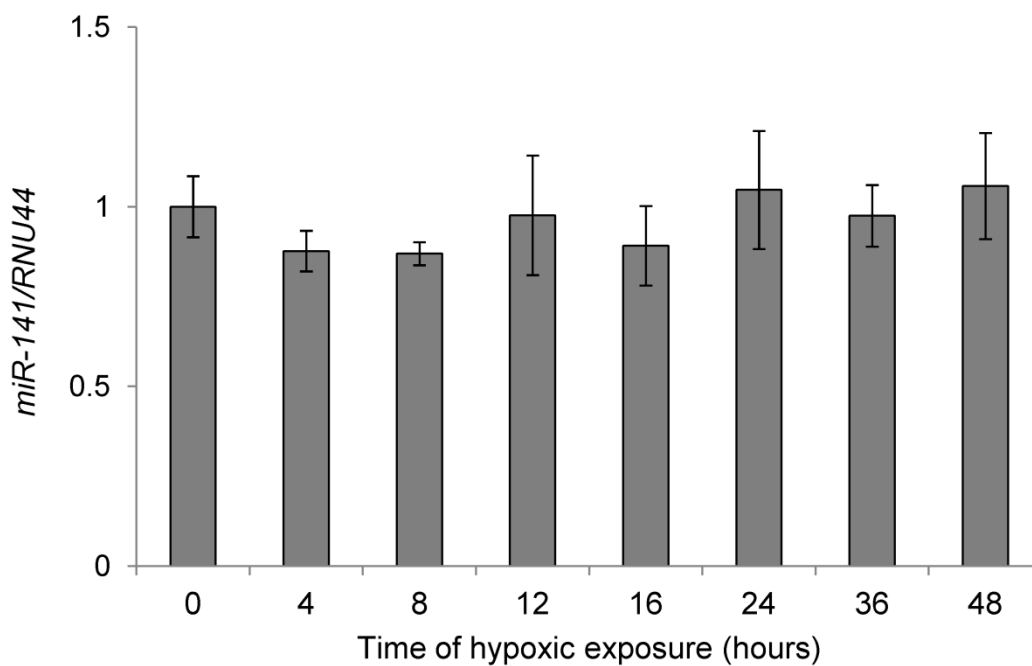

**Supplemental Figure 5.** Hypoxia does not affect expression profile of miR-141 in HUVECs. The miRNA levels were monitored in quantitative real-time PCR experiments. The results from 2 independent experiments (n = 8) are plotted normalized to *RNU44* and expressed as a fold change over the normoxic control (\*p < 0.05).
